# Supplementary material for: CircVAMP3 promotes acute lung injury progression by regulating the miR-580-3p/STING/IFN-β axis in macrophages
Source: PeerJ. 2025 Jun 26;13:e19573. doi: 10.7717/peerj.19573 (PMC12206400; doi:10.7717/peerj.19573)
Supplement: Supplemental Information 1 [file peerj-13-19573-s001.xlsx]

## Sheet: Sheet1
1-A	ct			lps
IL-1beta	0.796558	0.718728	1.48471	3.51905	4.18488	3.91818
	ct			lps
IFN-beta	0.975132	1.06093	0.963932	1.48487	1.72151	1.23714
1-B	ct			lps
circVAMP3	1.59113	1.08427	0.324597	2.28689	2.38676	2.58779
circATP8B4	0.956462	1.28264	0.760901	1.19122	1.91957	1.56639
circUBXN7	1.22991	1.04383	0.726258	1.11875	1.34433	1.37575
circEXOC6B	1.28093	1.07713	0.641945	0.336153	0.855905	1.09343
circRAB3D	1.18904	0.952508	0.858448	0.844676	0.559213	0.422826
circASPH	2.06146	0.67846	0.260076	0.777548	0.283614	0.288905
1-C	ct			lps
mRNA VAMP3	1.29127	1.13307	0.57566	0.869006	1.13539	0.656148
2-A	siNC			si-circVAMP3
circVAMP3	1.29744	0.896475	0.806084	0.430973	0.492775	0.381301
	siNC			si-circVAMP3
IL-1beta	0.91903	1.10052	0.980451	0.904286	0.876515	1.06795
	siNC			si-circVAMP3
IFN-beta	0.950631	1.00203	1.04734	0.664708	0.763025	0.383471
2-B	lenti-NC			lenti-circVAMP3
circVAMP3	0.965323	0.86799	1.16669	1.68851	2.59203	2.76846
	lenti-NC			lenti-circVAMP3
IL-1beta	0.76554	1.26098	0.973476	0.596482	0.797128	0.701193
	lenti-NC			lenti-circVAMP3
IFN-beta	1.04623	1.12912	0.824655	1.66462	2.00722	1.56215
3-A	ct			lps
cGAS	1.17327	0.886494	0.940234	2.00617	1.64404	1.77791
	ct			lps
STING	1.03496	0.997843	0.967193	2.07293	1.65097	1.89973
	CT						LPS
MDA5	0.439972	1.37283	1.37124	0.844099	0.971858		1.62317	1.6921	1.35549	1.63446	1.60083	1.16244
	CT						LPS
RIG-1	1.00564	1.01968	1.2338				1.01615	0.94155	1.0423
3-B	siNC			si-circVAMP3
STING	1.27343	0.940863	0.785703	0.277467	0.402964	0.470975
	siNC			si-circVAMP3
cGAS	0.959922	0.810933	1.22914	1.11547	1.26955	1.51326
	si-NC			si-circVAMP3
MDA5	1.24036	1.0836	0.67605	0.621038	1.35255	1.4068
3-C	lenti-NC			lenti-circVAMP3
STING	1.00128	1.08687	0.91184	3.42678	2.59701	1.64359
	lenti-NC			lenti-circVAMP3
cGAS	1.09115	1.0029	0.905955	1.04187	0.864044	1.36211
	lenti-NC			lenti-circVAMP3
MDA5	0.78914	0.844802	1.36606	0.93845	0.772007	0.856595
5-A	ct			lps
miR-580-3p	1.02688	0.972653	1.00046	0.854588	0.630032	0.675948
	siNC			si-circVAMP3
miR-580-3p	0.728255	1.27601	0.99573	1.65172	2.03033	2.85526
	lenti-NC			lenti-circVAMP3
miR-580-3p	0.93303	0.954838	1.11213	0.598737	0.703032	0.696564
5-B	minic NC			minic
STING	0.912863	0.890134	1.197	0.72033	0.494989	0.702379
cGAS	0.991638	0.889882	1.11848	0.696733	0.801103	0.995491
IFN-beta	0.933416	0.97458	1.092	0.699012	0.621244	0.639329
5-C	inhibitor NC			inhibitor
STING	1.35625	1.12248	0.521268	1.66374	1.91208	2.22326
cGAS	1.6872	0.90042	0.412378	0.380309	0.231655	0.634111
IFN-beta	1.19005	0.93483	0.875116	1.57316	1.78356	2.13558
